# Supplementary material for: Immunomodulatory role of nonneuronal cholinergic signaling in myocardial injury
Source: JCI journal article supplement (doi:10.1172/jci.insight.128961), 2019-06-04
Supplement: sd1 [file 1]

## SUPPLEMENTAL FIGURES

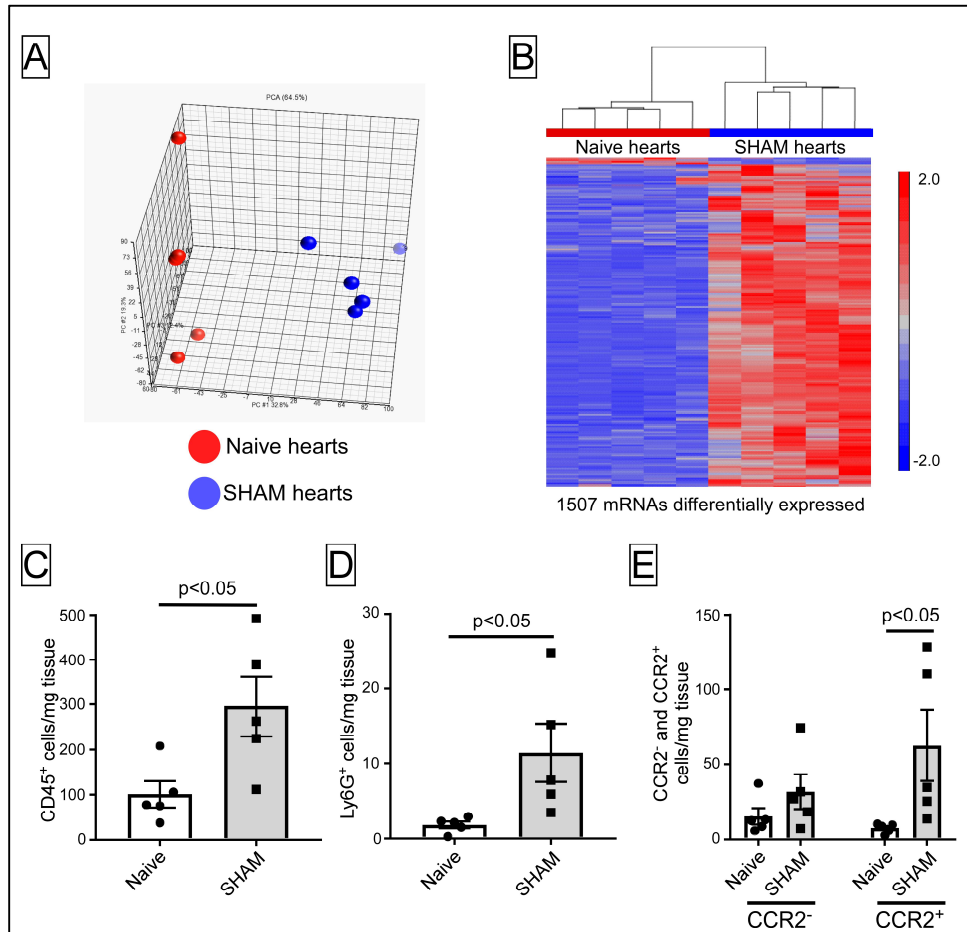

**Figure S-1: Activation of the cardiac inflammatory response in the hearts of SHAM mice.** Male C57BL/6J (10 weeks) were subjected to open-chest I/R (ischemia/reperfusion) SHAM procedure in order to examine the effects of this surgery in cardiac inflammation. The procedure consisted of thoracotomy and a suture passed around LAD (Left Anterior Descending coronary). The mouse chest was kept open for approximately 45 min. We chose to study an open-chest I/R SHAM because this is the most common surgical procedure used to study cardiac inflammation. Mice were sacrificed 5 days after the procedure and the hearts were removed and used in RNAseq and flow cytometry experiments. The naïve group consists of male littermate controls (C57BL/6J) not subjected to surgery. **A**) Principal component analysis of a total of 15,835 mRNAs from Naïve (n=5) and SHAM hearts (n=5) showed two distinct populations. **B**) Hierarchical clustering based on significantly expressed genes in the SHAM vs Naïve hearts (|fold-change| $\geq$ 2, FDR<0.01; 1,507 mRNAs). KEGG pathway analyses of the differentially expressed genes marked dysregulation of several pathways related to inflammation (TNF signaling pathway, Chemokine signaling pathway, Phagosome, Hematopoietic cell lineage, Cytokine-Cytokine receptor interaction, Fc gamma R-mediated phagocytosis, Toll-like receptor signaling pathway, Natural Killer cell mediated cytotoxicity, B cell receptor signaling pathway, NOD-like receptor signaling pathway, Leukocyte transendothelial migration, NF-kappa B signaling pathway). The data is available on the NCBI GEO repository, accession number GSE120867. **C-E**) Flow cytometry analyses showed that the number of CD45<sup>+</sup> cells (p=0.03, leukocytes), CD45<sup>+</sup>Ly6G<sup>+</sup> cells (p=0.04, neutrophils) and CD45<sup>+</sup>Ly6G<sup>-</sup>CCR2<sup>+</sup> cells (p=0.04, CCR2<sup>+</sup> macrophages) was significantly increased in the hearts of SHAM mice as compared to naïve hearts n=5 hearts/condition. P values were calculated with Student's *t*-test.

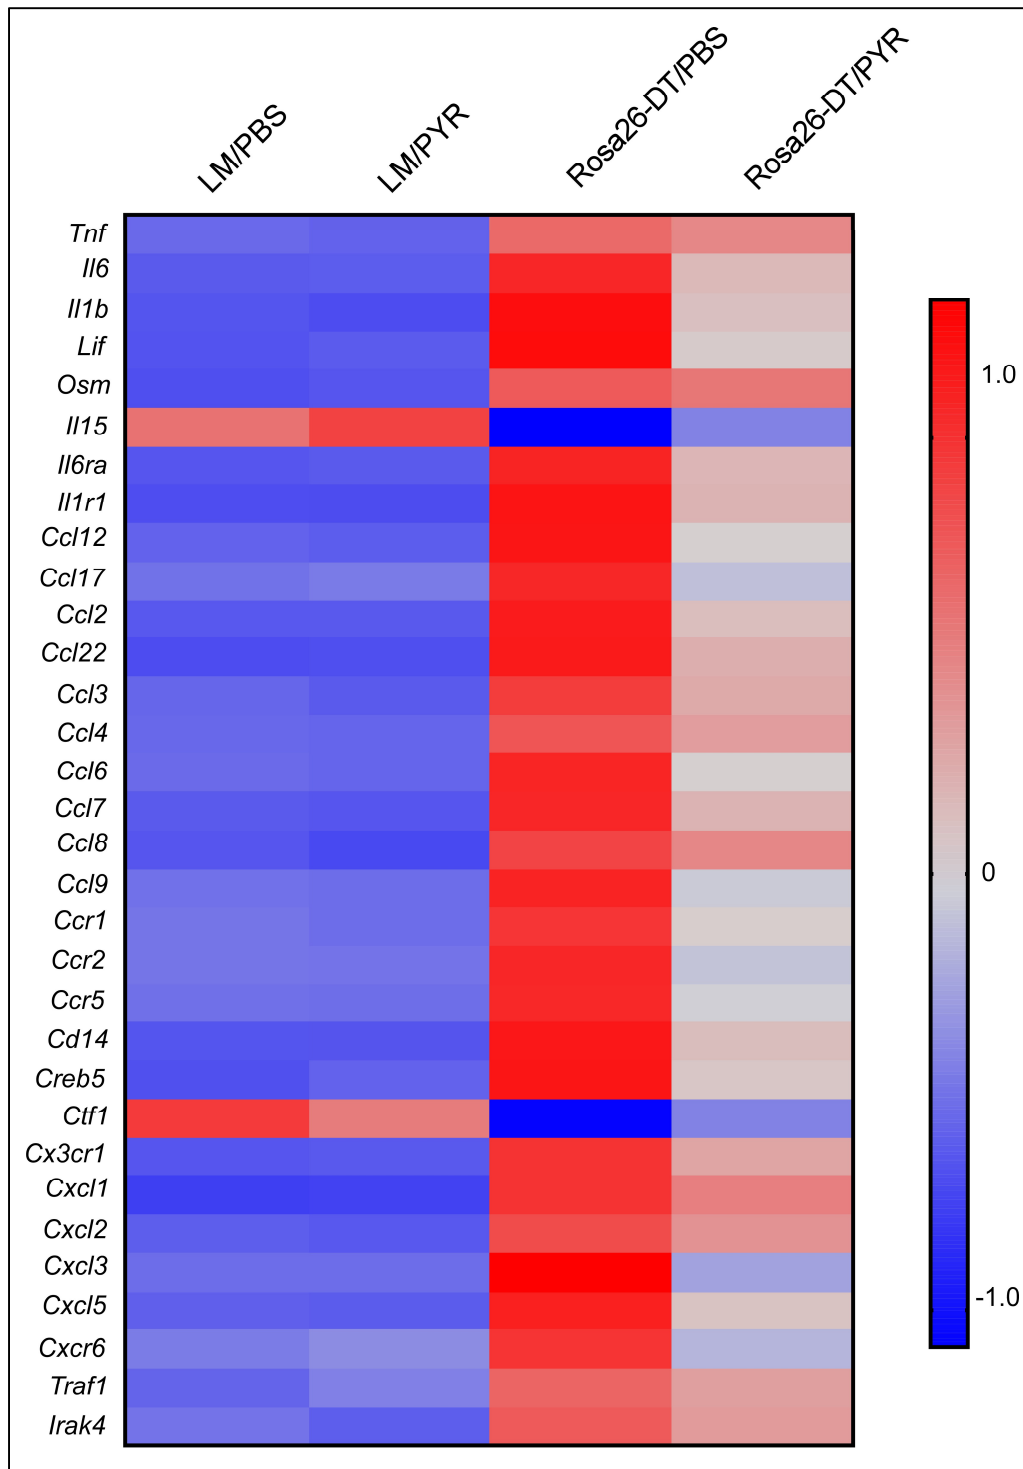

**Figure S-2: Heat map of the PYR-induced reversed genes at Day 5.** Cytokines, chemokines and receptors of cytokines and chemokines differentially expressed in Rosa26-DT<sup>Mlv2c-Cre</sup> (Rosa26-DT)/PYR hearts in comparison to Rosa26-DT<sup>Mlv2c-Cre</sup>/PBS. Specific genes were identified in the top 4 high-scored inflammatory KEGG pathways ( $|\text{fold-change}| \geq 1.5$  and  $\text{FDR} < 0.05$ ;  $n = 6$  hearts/condition).

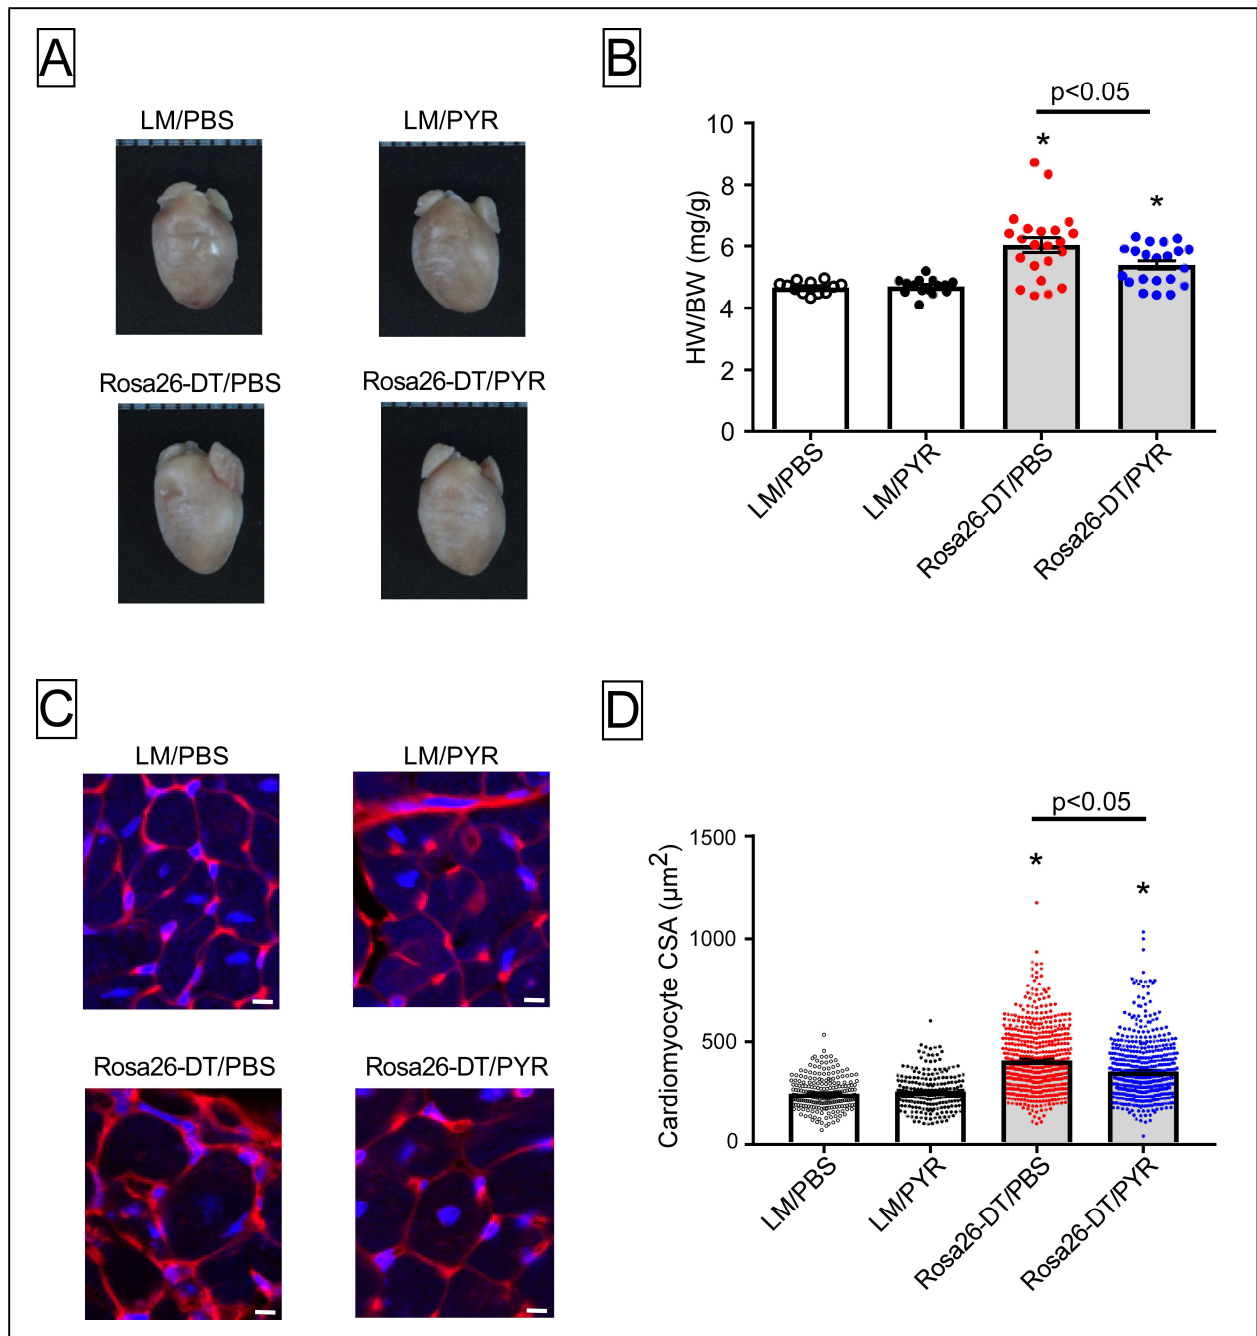

**Figure S-3: Cardiac hypertrophy is significantly attenuated by PYR in injured hearts at Day 5 post DT administration.** **A)** Heart representative pictures. **B)** Heart Weight/Body Weight ratio in LM and Rosa26-DT<sup>Mlv2c-Cre</sup> (Rosa26-DT) mice diluent- or PYR-treated.  $n=12-22$  hearts/condition. \* =  $p < 0.05$  in comparison to LM hearts. **C)** Representative WGA stained hearts. Scale bar:  $10\mu\text{m}$ . **D)** Cardiomyocyte cross-sectional area (CSA) is increased following injury. PYR treatment significantly inhibited the increase in cardiomyocyte CSA induced by injury. Data obtained from 4 hearts.  $n \sim 250-500$  cells analyzed per condition. \* =  $p < 0.05$  in comparison to LM hearts.  $P$  values were calculated with one-way ANOVA followed by the Tukey post hoc test.

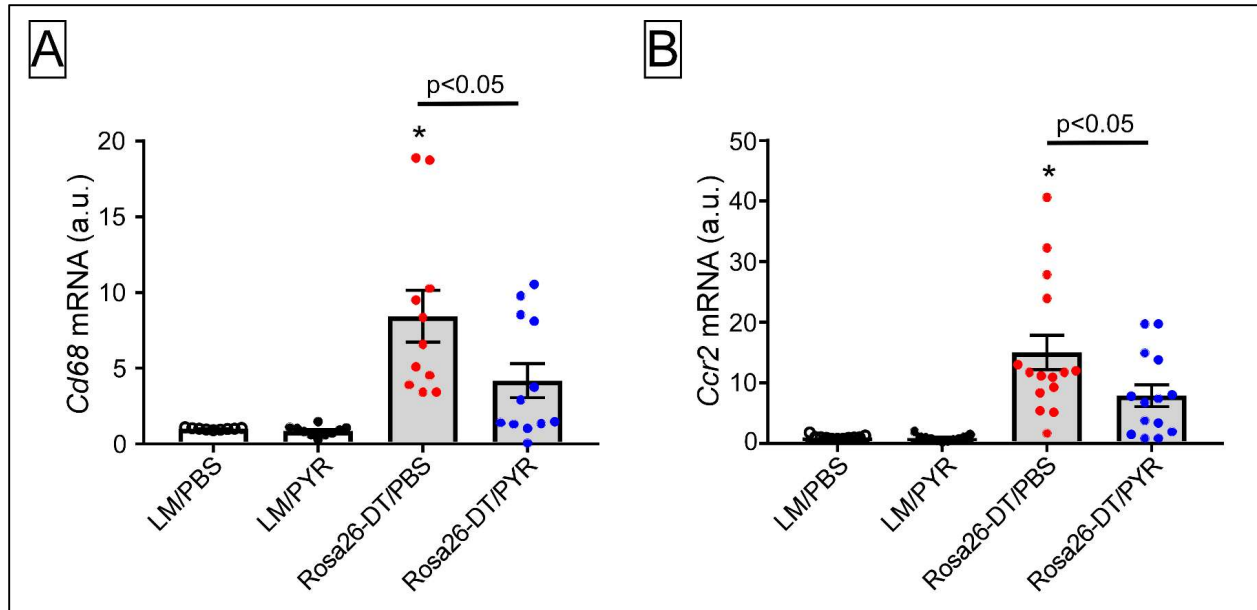

**Figure S-4: RNA expression of macrophage markers in the heart at Day 5 post-injury.** A-B) Bar-graph showing the expression of *Cd68* and *Ccr2* mRNAs in hearts from LM and Rosa26-DT<sup>Mlv2c-Cre</sup> (Rosa26-DT) treated or not with PYR. Injury leads to an increase in the mRNA of these markers. PYR treatment significantly reduces the expression of *Cd68* and *Ccr2* in injured hearts (n=9-15 hearts per condition.). \* = p<0.05 in comparison to LM hearts. P values were calculated with one-way ANOVA followed by the Tukey post hoc test.



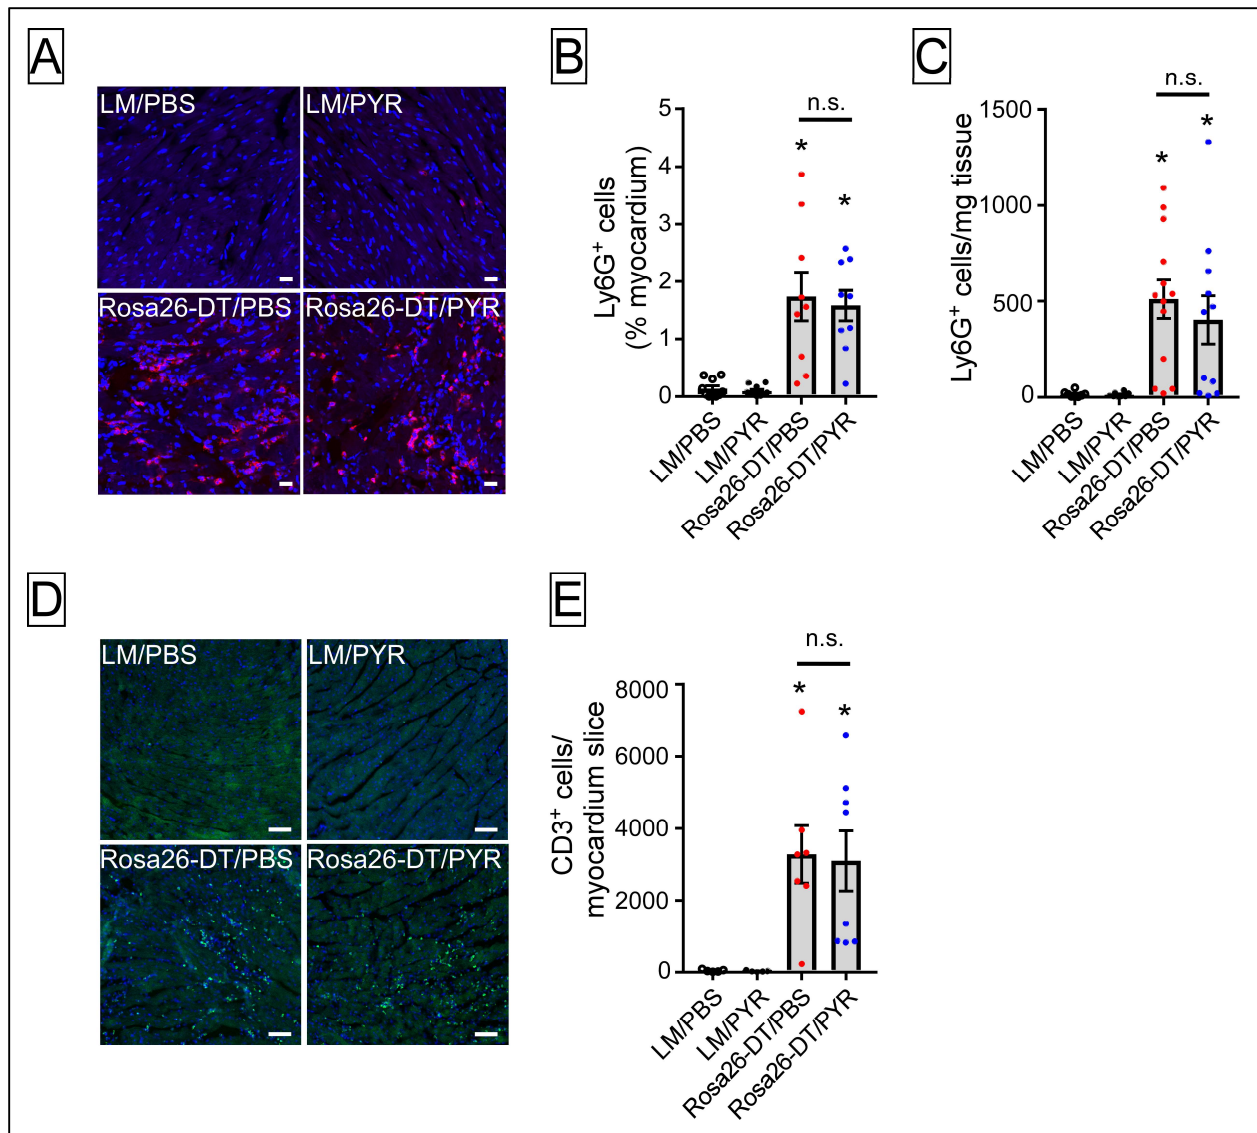

**Figure S-5: PYR does not change the number of Ly6G<sup>+</sup> cells and CD3<sup>+</sup> cells in injured hearts (Day 5).** **A)** Representative pictures of Ly6G<sup>+</sup> cells in the heart. Scale bar=20 $\mu$ m. **B)** Bar-graph showing the Ly6G stained area. n=9-10 myocardium sections obtained from 5 hearts per condition. **C)** Flow cytometry analyses showing the number of CD45<sup>+</sup>Ly6G<sup>+</sup> cells/mg of cardiac tissue (n=8-13 hearts per condition). **D)** Representative pictures of CD3<sup>+</sup> cells in the heart (Scale bar= 50 $\mu$ m). **E)** Quantification of CD3<sup>+</sup> cells per myocardium slice. n=6-8 hearts per condition. \* =  $p < 0.05$  in comparison to LM hearts; n.s.: not significant.  $P$  values were calculated with one-way ANOVA followed by the Tukey post hoc test.

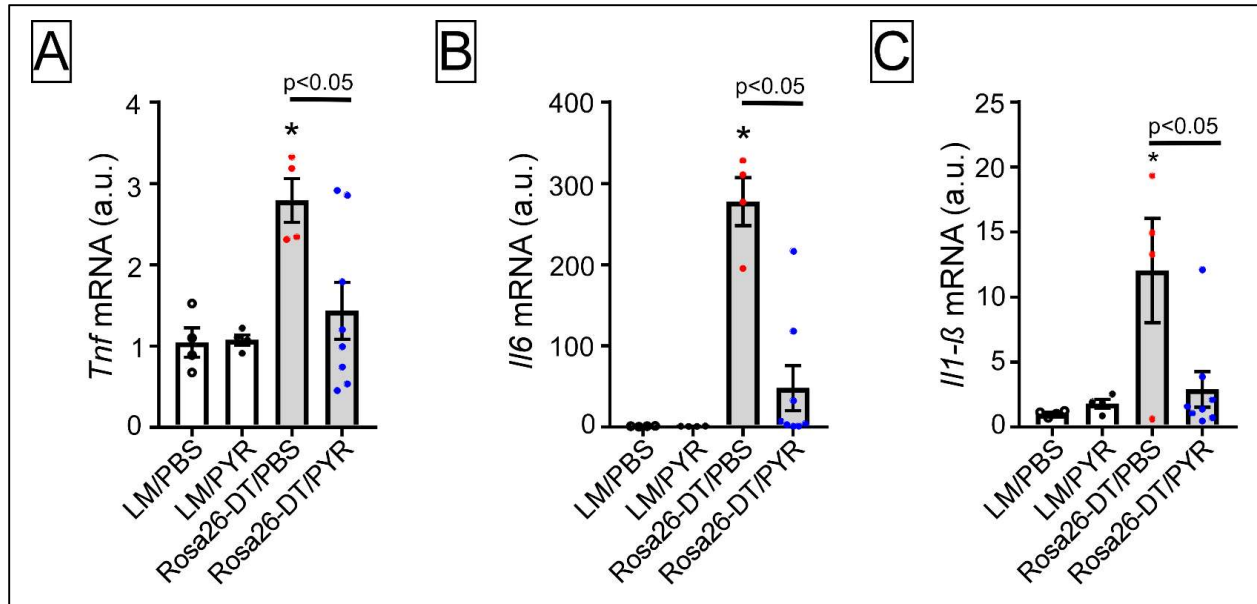

**Figure S-6: PYR treatment inhibits the expression of pro-inflammatory cytokines in the heart at Day 3 post DT injection.** A-C) Pro-inflammatory cytokines mRNA expression in the heart at Day 3. *Tnf*, *Il6* and *Il-1b* mRNAs are increased in the hearts of Rosa26-DT<sup>Mlv2c-Cre</sup> (Rosa26-DT)/PBS mice. In PYR-treated mice, the expression of these cytokines is significantly reduced. \* = p<0.05 in comparison to LM hearts. n=4-8 hearts/condition. P values were calculated with one-way ANOVA followed by the Tukey post hoc test.

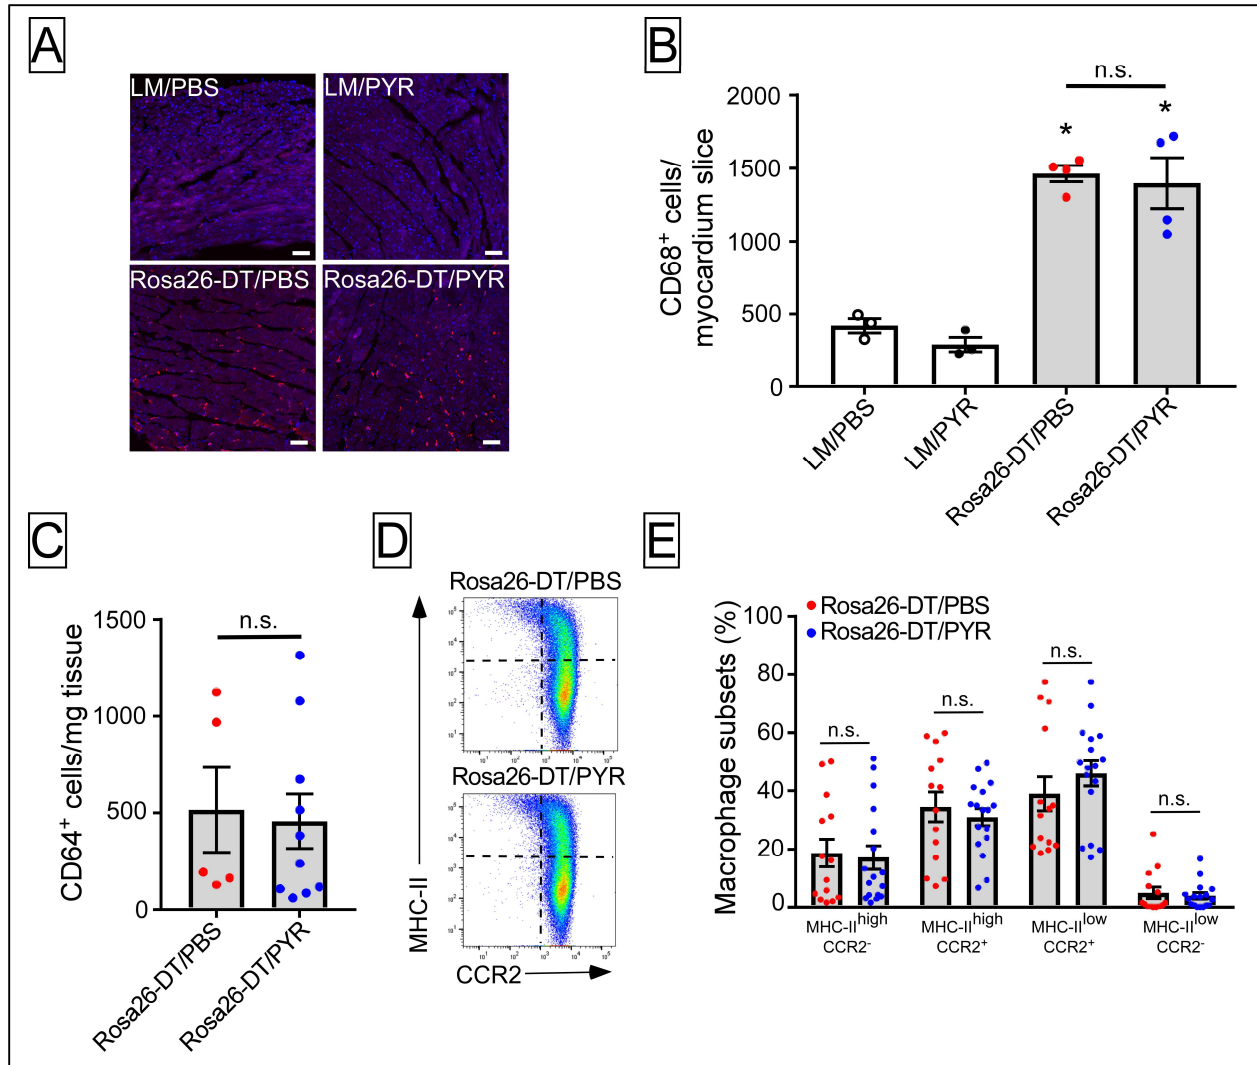

**Figure S-7: PYR treatment does not change the number of CD68<sup>+</sup> cells in the heart at Day 3.** **A)** Representative pictures of CD68<sup>+</sup> cells in the heart at Day 3 (Scale bar= 50 $\mu$ m). **B)** Quantification of the number of CD68<sup>+</sup> cells in the heart. n= 3-4 myocardium slices obtained from 3-4 hearts per condition. **C)** Quantification of the number of CD45<sup>+</sup>Ly6G<sup>-</sup>CD64<sup>+</sup> cells in the hearts of Rosa26-DT<sup>Mlv2c-Cre</sup> (Rosa26-DT)/PBS and Rosa26-DT<sup>Mlv2c-Cre</sup> /PYR mice by flow cytometry (n=5-10 hearts/condition). **D-E)** Macrophage subsets composition (CD45<sup>+</sup>Ly6G<sup>-</sup>CD64<sup>+</sup>MHC-II<sup>high/low</sup>CCR2<sup>+/-</sup>) in the injured hearts treated or not with PYR at day 3 (n=14-17 hearts/condition). \* = p<0.05 in comparison to LM hearts; n.s. = not significant. *P* values were calculated with one-way ANOVA followed by the Tukey post hoc test for panel **(B)** and Student's *t*-test for panels **(C)** and **(E)**.

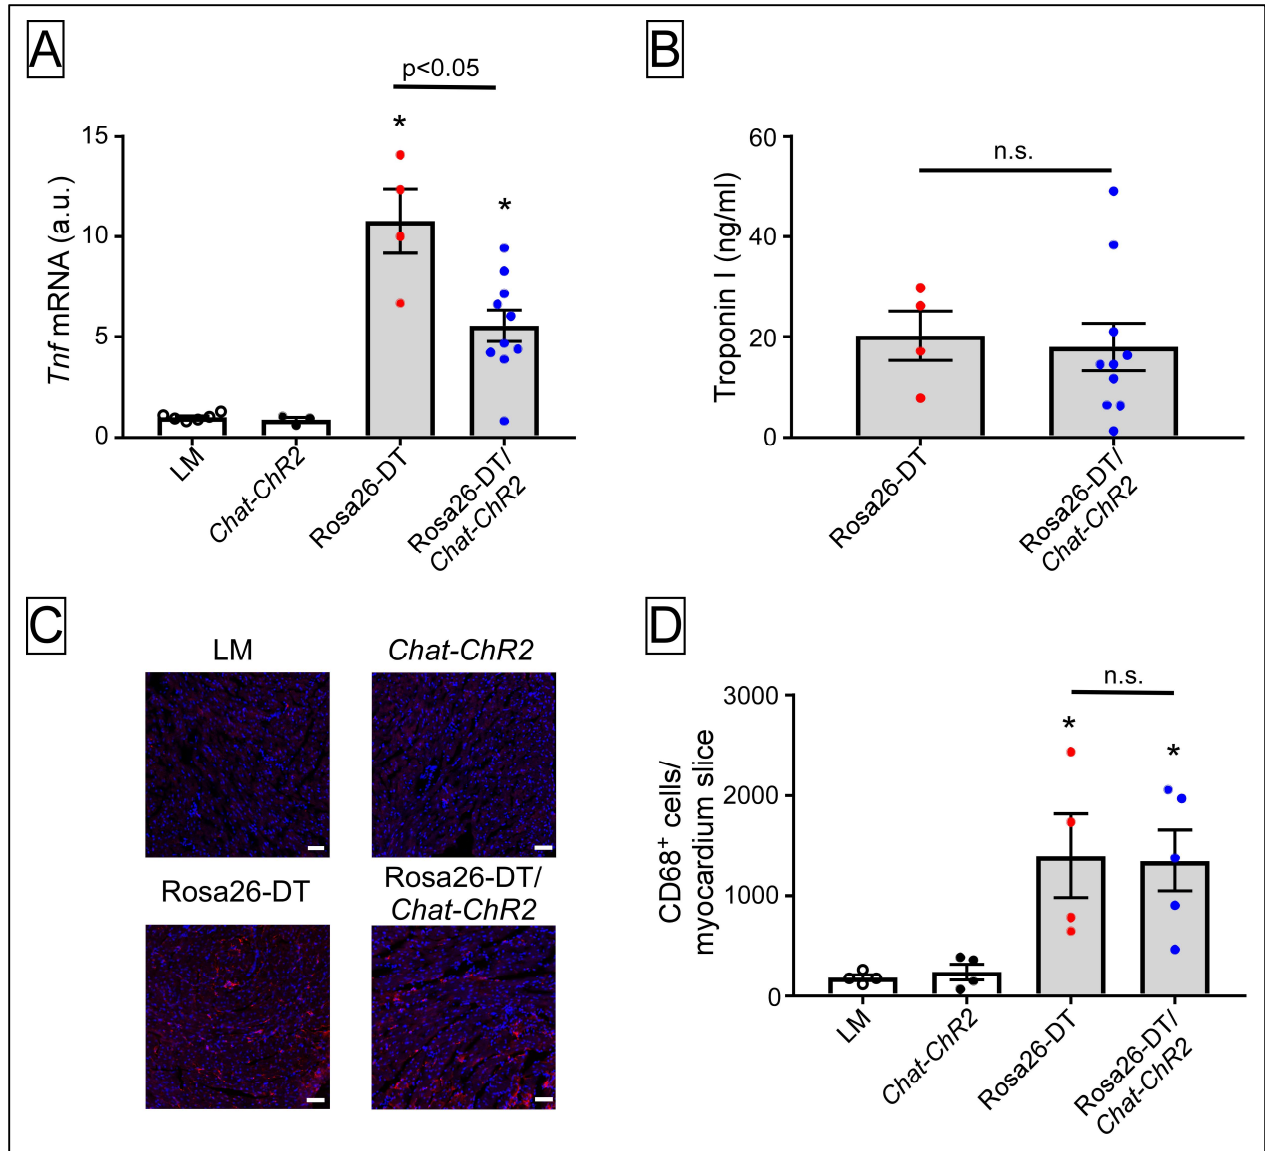

**Figure S-8: Characterization of the Rosa26-DT<sup>Mlv2c-Cre</sup>/Chat-ChR2 model at Day 3 post-DT.** **A)** *Tnf* mRNA expression in the hearts of LM, *Chat-ChR2*, Rosa26-DT<sup>Mlv2c-Cre</sup> and Rosa26-DT<sup>Mlv2c-Cre</sup>/Chat-ChR2 mice on day 3 (n=3-10 hearts per condition). **B)** Troponin I levels in the serum of Rosa26-DT<sup>Mlv2c-Cre</sup> (Rosa26-DT) and Rosa26-DT<sup>Mlv2c-Cre</sup>/Chat-ChR2 (n=4-10 samples) mice. **C)** Representative fluorescence images of CD68<sup>+</sup> staining in the hearts of LM, *Chat-ChR2*, Rosa26-DT<sup>Mlv2c-Cre</sup> and Rosa26-DT<sup>Mlv2c-Cre</sup>/Chat-ChR2 mice on day 3 (Scale bar= 50μm). **D)** Quantification of CD68<sup>+</sup> cells in the heart (n=4-5 myocardium sections obtained from 4-5 hearts/condition). \* = p<0.05 in comparison to LM hearts; n.s = not significant. *P* values were calculated with one-way ANOVA followed by the Tukey post hoc test for panel (B) and (D) and Student's *t*-test for panels (A).

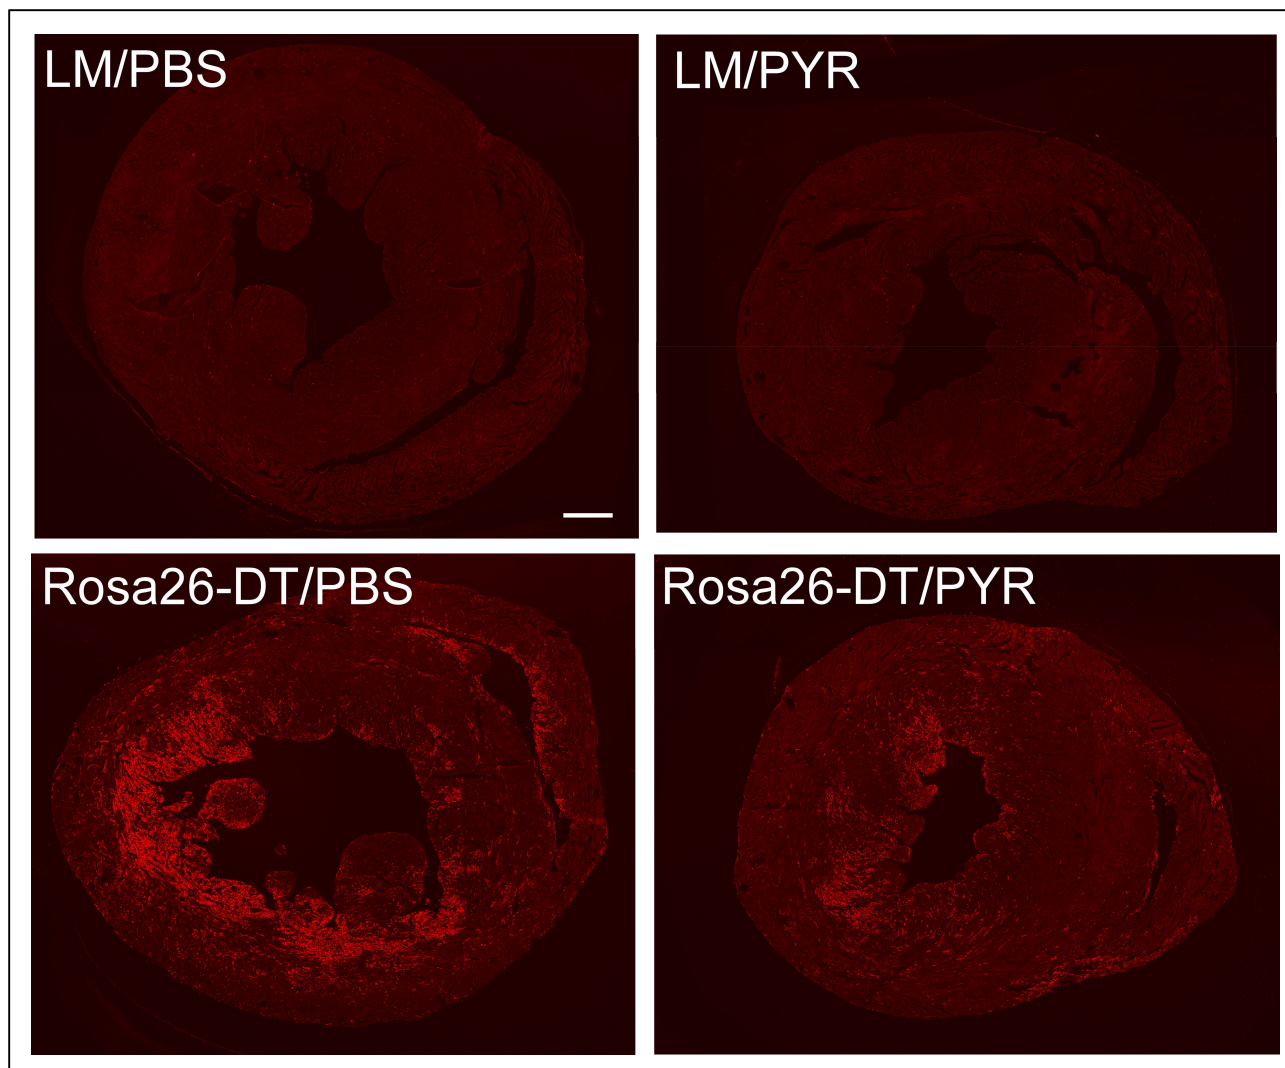

**Figure S-9: Representative fluorescent microscopic images of myocardial sections (~70-130 per section) from 10X tile scanning of the entire heart at the mid-papillary level using a confocal microscopy (see methods for details). Scale bar = 500 $\mu$ m.**



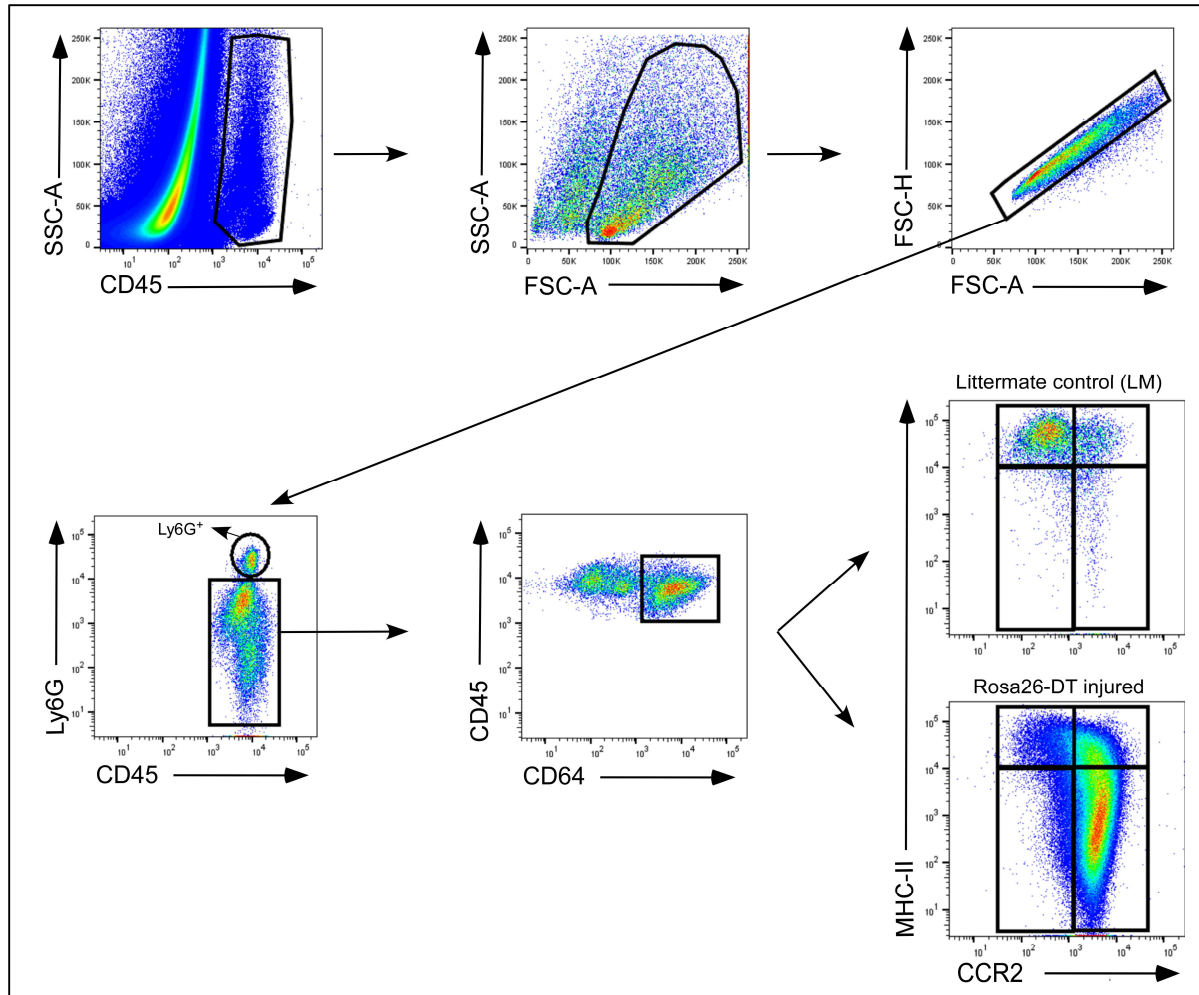

**Figure S-10: Gating strategy for the FACS analysis used to identify the macrophage/monocyte subsets in the heart.** Neutrophils were gated as CD45<sup>+</sup>Ly6G<sup>+</sup> cells. Macrophages were gated as CD45<sup>+</sup>Ly6G<sup>-</sup>CD64<sup>+</sup> cells. CD45<sup>+</sup>Ly6G<sup>-</sup>CD64<sup>+</sup> macrophage/monocytes subsets were MHC-II<sup>high</sup>CCR2<sup>-</sup>, MHC-II<sup>high</sup>CCR2<sup>+</sup>, MHC-II<sup>low</sup>CCR2<sup>+</sup> and MHC-II<sup>low</sup>CCR2<sup>-</sup> cells.

## SUPPLEMENTAL TABLES

**Table S-1:** List of primers used in the RT-PCR experiments.

| <b>Gene</b>            | <b>Brand</b>                | <b>Assay identification</b> |
|------------------------|-----------------------------|-----------------------------|
| <i>Cd68</i>            | Integrated DNA Technologies | Mm.PT.58.32698807           |
| <i>Ccr2</i>            | Integrated DNA Technologies | Mm.PT.58.14116710           |
| <i>Tnf</i>             | Integrated DNA Technologies | Mm.PT.58.12575861           |
| <i>Il6</i>             | Integrated DNA Technologies | Mm.PT.58.10005566           |
| <i>Il1b</i>            | Integrated DNA Technologies | Mm.PT.58.41616450           |
| <i>Ccl2</i>            | Integrated DNA Technologies | Mm.PT.58.42151692           |
| <i>Ccl7</i>            | Integrated DNA Technologies | Mm.PT.58.17719534           |
| <i>Rplp0</i>           | Integrated DNA Technologies | Mm.PT.58.43894205           |
| <i>Slc18a3 (Vacht)</i> | Applied Biosystems          | Mm00491465_s1               |
| <i>Ccl2</i>            | Applied Biosystems          | Mm00441242_m1               |
| <i>Ccl7</i>            | Applied Biosystems          | Mm00443113_m1               |
| <i>Gapdh</i>           | Applied Biosystems          | Mm99999915_g1               |
| <i>Rplp0</i>           | Applied Biosystems          | Mm00725448_s1               |



**Table S-2:** List of antibodies used in the immunofluorescence experiments.

| <b>Antibody</b>                 | <b>Brand</b>        | <b>Proportion of Antibody</b> |
|---------------------------------|---------------------|-------------------------------|
| Rat anti-mouse CD68 (MAC1957)   | BioRad              | 1:400                         |
| Rat anti-mouse Ly-6G (1A8)      | BD Biosciences      | 1:200                         |
| Anti-mouse CD3e FITC (145-2C11) | eBioscience         | 1:50                          |
| Rabbit anti-VACHT               | Synaptic Systems    | 1:100                         |
| Rabbit anti-M3                  | Abcam               | 1:100                         |
| Rabbit anti-M1                  | Sigma-Aldrich       | 1:100                         |
| Rhodamine WGA                   | Vector Laboratories | 1:200                         |

**Table S-3:** List of antibodies used in the flow cytometry experiments.

| <b>Antibody</b> | <b>Brand</b> | <b>Clone</b> | <b>Fluorophore</b>   |
|-----------------|--------------|--------------|----------------------|
| CD45            | BioLegend    | 30-F11       | PerCP/Cy5.5          |
| Ly-6G           | BioLegend    | 1A8          | FITC                 |
| CD64            | BioLegend    | X54-5/7.1    | PE                   |
| F4/80           | BioLegend    | BM8          | PE                   |
| I-A/I-E         | BioLegend    | M5/114.15.2  | PE/Cy7               |
| CD192 (CCR2)    | BioLegend    | SA203G11     | Brilliant Violet 421 |
| Ly-6C           | BioLegend    | HK1.4        | APC/Cy7              |
| CD3             | BioLegend    | 17A2         | APC                  |
| CD19            | BioLegend    | 6D5          | PE/Cy7               |
